# Supplementary material for: Efficacy of bupropion and varenicline genetic markers in choosing pharmacological treatment for smoking cessation, and implications for combining drugs: A randomized controlled trial – GENTSMOKING
Source: PubMed Central journal article supplement (PMC11019925; doi:10.18332/tid/186072), 2024-04-16
Supplement: TID-22-62-s1.pdf [file TID-22-62-s1.pdf]

Supplemental Table 1. Abstinence rates between different subgroups considering polymorphism favorable markers and drug used. Logistic regression model

|                                                                                                     | Abstinence in week 4 |           | OR (IC95%)         | p      |
|-----------------------------------------------------------------------------------------------------|----------------------|-----------|--------------------|--------|
|                                                                                                     | No                   | Yes       |                    |        |
| <b>Comparisons between different subgroups</b>                                                      |                      |           |                    |        |
| <b>1 – each genetic subgroups vs control group</b>                                                  |                      |           |                    | 0.001  |
| Genetic favorable bupropion – drug used bupropion                                                   | 81 (81.0)            | 19 (19.0) | 0.31 (0.17 a 0.56) | <0.001 |
| Genetic favorable varenicline – drug used varenicline                                               | 36 (57.1)            | 27 (42.8) | 1.00 (0.56 a 1.78) | 0.991  |
| Genetic not favorable for both- both drugs used                                                     | 11 (52.4)            | 10 (47.6) | 1.21 (0.49 a 3.00) | 0.683  |
| Control group – drug used varenicline                                                               | 101 (57.1)           | 76 (42.9) | reference          | -      |
| <b>2 – favorable genetic marker to varenicline vs not favorable marker in all varenicline users</b> |                      |           |                    |        |
| Polymorphism favorable to varenicline – drug used varenicline                                       | 111 (57.8)           | 81 (42.2) | 0.86 (0.46 a 1.63) | 0.648  |
| Polymorphism not favorable to varenicline – drug used varenicline                                   | 26 (54.2)            | 22 (45.8) | reference          | -      |

p - descriptive level of the logistic regression model; OR - odds ratio; 95% CI - 95% confidence interval

Supplemental Table 2. Comparison of the efficacy of different strategies using combinations of varenicline and bupropion drugs.

| Cohort group                            | Abstinence continues between week 8-12 |              | p     |
|-----------------------------------------|----------------------------------------|--------------|-------|
|                                         | N (%)                                  | IC95%        |       |
| started varenicline + bupropion         | 15/21 (71.4)                           | 47.8 to 88.7 |       |
| started varenicline and added bupropion | 49/79 (62.2)                           | 50.4 to 72.7 | 0.725 |
| started bupropion and added varenicline | 25/39 (54.1)                           | 46.0 to 78.2 |       |

\*p - descriptive level of the logistic regression model; 95% CI - 95% confidence interval

Supplemental Table 3. Interruption of treatment according to the initial medication.

| Drug                  | Interruption of treatment |           | OR (IC95%)         | p      |
|-----------------------|---------------------------|-----------|--------------------|--------|
|                       | No                        | Yes       |                    |        |
| varenicline           | 215 (88.8)                | 25 (11.3) | Reference          | -      |
| bupropion             | 69 (69.0)                 | 31 (31.0) | 3.54 (1.98 a 6.35) | <0,001 |
| varenicline+bupropion | 17 (81.0)                 | 4 (19.0)  | 1.86 (0.58 a 5.92) | 0,296  |

p - descriptive level of the logistic regression model; OR- odds ratio; 95% CI - 95% confidence interval

Supplemental table 4 – Adverse events until week 4 according to drug used.

| Participants<br>n 361                           | Medication until week 4            |                                     |                                              |
|-------------------------------------------------|------------------------------------|-------------------------------------|----------------------------------------------|
|                                                 | vareniclina<br>2 mg/day<br>(n=240) | Bupropion<br>300 mg /day<br>(n=100) | Both drugs (2mg/day<br>+150mg/day)<br>(n=21) |
| Adverse Events                                  |                                    |                                     |                                              |
| Interrupted the drug and discontinued treatment | 2 (1%)                             | 11 (11%)                            | 1(5%)                                        |
| Serious adverse event                           | 0                                  | 0                                   | 0                                            |
| Any adverse events                              | 148 (61.6%)                        | 61 (61%)                            | 15 (71.4%)                                   |
| Events reported                                 |                                    |                                     |                                              |
| nausea                                          | 104 (30%)                          | 2(2%)                               | 10 (47%)                                     |
| constipation                                    | 10 (3%)                            | 4 (4%)                              | 0                                            |
| dreams lived                                    | 13 (5%)                            | 0                                   | 0                                            |
| dry mouth                                       | 0                                  | 13(13%)                             | 0                                            |
| insomnia                                        | 11(4%)                             | 27(27%)                             | 5(24%)                                       |
| sleepiness                                      | 3 (1%)                             | 0                                   | 0                                            |
| headache                                        | 2 (<1%)                            | 5(5%)                               | 0                                            |
| irritability                                    | 0                                  | 2(2%)                               | 0                                            |
| Metallic taste                                  | 3 (1%)                             | 1(1%)                               | 0                                            |
| no medication related                           | 2 (<1%)                            | 1(1%)                               | 0                                            |
| tremor                                          | 0                                  | 6(6%)                               | 0                                            |

Supplemental Table 5- Adverse events after week 5 according to drugs used

| Participants                                      | Adverse events from week 5 to week 12 |                                      |                                                   |                                                       |                                                     |
|---------------------------------------------------|---------------------------------------|--------------------------------------|---------------------------------------------------|-------------------------------------------------------|-----------------------------------------------------|
|                                                   | varenicline<br>2mg/day<br>(n=136)     | bupropion<br>300<br>mg/dia<br>(n=30) | Both<br>drugs<br>2mg +<br>150<br>mg/day<br>(n=17) | varenicline<br>added<br>bupropion<br>150mg.<br>(n=79) | bupropion<br>added<br>varenicline<br>2mg.<br>(n=39) |
| Events                                            |                                       |                                      |                                                   |                                                       |                                                     |
| Discontinued<br>treatment<br>for adverse<br>event | 0                                     | 0                                    | 0                                                 | 0                                                     | 0                                                   |
| Interrupted<br>Varenicline                        | 1                                     |                                      | 0                                                 | 1                                                     | 0                                                   |
| Interrupted<br>bupropion                          |                                       | 1                                    | 0                                                 | 6                                                     | 1                                                   |
| Any adverse<br>events                             | 12(9%)                                | 11 (36%)                             | 3(17%)                                            | 23(29%)                                               | 20 (51%)                                            |
| Events<br>reported                                |                                       |                                      |                                                   |                                                       |                                                     |
| nausea                                            | 5 (4%)                                | 0                                    | 2<br>(12%)                                        | 3(4%)                                                 | 13 (33%)                                            |
| constipation                                      | 4 (3%)                                | 1(3%)                                | 0                                                 | 4(5%)                                                 | 3(8%)                                               |
| dizziness                                         | 0                                     | 0                                    | 0                                                 | 1 (1%)                                                | 0                                                   |
| dreams lived                                      | 0                                     | 0                                    | 0                                                 | 0                                                     | 3(8%)                                               |
| dry mouth                                         | 0                                     | 2(6%)                                | 0                                                 | 2 (2%)                                                | 0                                                   |
| insomnia                                          | 0                                     | 8 (27%)                              | 1(6%)                                             | 9 (11%)                                               | 0                                                   |
| headache                                          | 1(<1%)                                | 0                                    | 0                                                 | 1(1%)                                                 | 0                                                   |
| irritability                                      | 0                                     | 0                                    | 0                                                 | 1(1%)                                                 | 0                                                   |
| metallic<br>taste                                 | 0                                     | 0                                    | 0                                                 | 1(1%)                                                 | 0                                                   |
| no<br>medication<br>related                       | 0                                     | 1                                    | 0                                                 | 0                                                     | 0                                                   |
| flatulence                                        | 1(<1%)                                | 0                                    | 0                                                 | 1(1%)                                                 | 1(2%)                                               |
| allergy                                           | 0                                     | 0                                    | 0                                                 | 1(1%)                                                 | 0                                                   |
